# Supplementary material for: Preclinical Melanoma Imaging with 68Ga-Labeled α-Melanocyte-Stimulating Hormone Derivatives Using PET
Source: PubMed Central journal article supplement — Theranostics. 2017 Feb 8;7(4):805–13. doi: 10.7150/thno.17117 (PMC5381245; doi:10.7150/thno.17117), 2017-02-08
Supplement: thnov07p0805s1.pdf [file thnov07p0805s1.pdf]

**Supplementary materials**  
**for**  
**Preclinical Melanoma Imaging With  $^{68}\text{Ga}$ -Labeled  $\alpha$ -Melanocyte-Stimulating**  
**Hormone Derivatives Using PET**

Chengcheng Zhang<sup>1</sup>, Zhengxing Zhang<sup>1</sup>, Kuo-Shyan Lin<sup>1,2</sup>, Jinhe Pan<sup>1</sup>, Iulia Dude<sup>1</sup>, Navjit  
Hundal-Jabal<sup>1</sup>, Nadine Colpo<sup>1</sup>, François Bénard\*<sup>1,2</sup>

<sup>1</sup>Department of Molecular Oncology, BC Cancer Agency, Vancouver, BC, Canada

<sup>2</sup>Department of Radiology, University of British Columbia, Vancouver, BC, Canada

**\*Corresponding Author**

Dr. François Bénard. Address: Department of Molecular Oncology, BC Cancer Agency, 675 West 10<sup>th</sup> Avenue, Rm 14-111, Vancouver, BC V5Z 1L3, Canada. Phone: 604-675-8206. Fax: 604-675-8218. E-mail: fbenard@bccrc.ca.

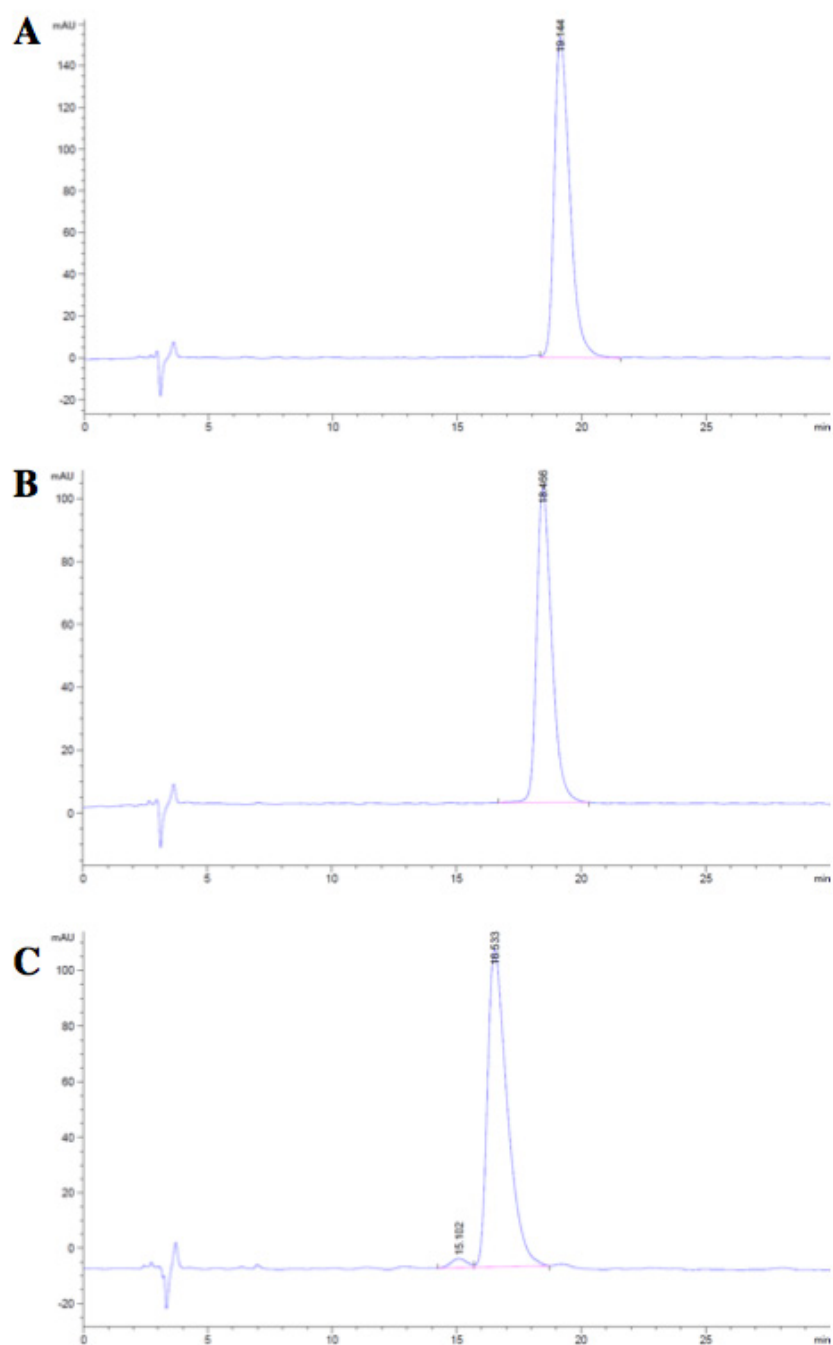

**Figure S1.** HPLC purity determination for non-radioactive gallium-labeled **A.** CCZ01047 (>99%), **B.** CCZ01048 (>99%), and **C.** CCZ01056 (>97%).

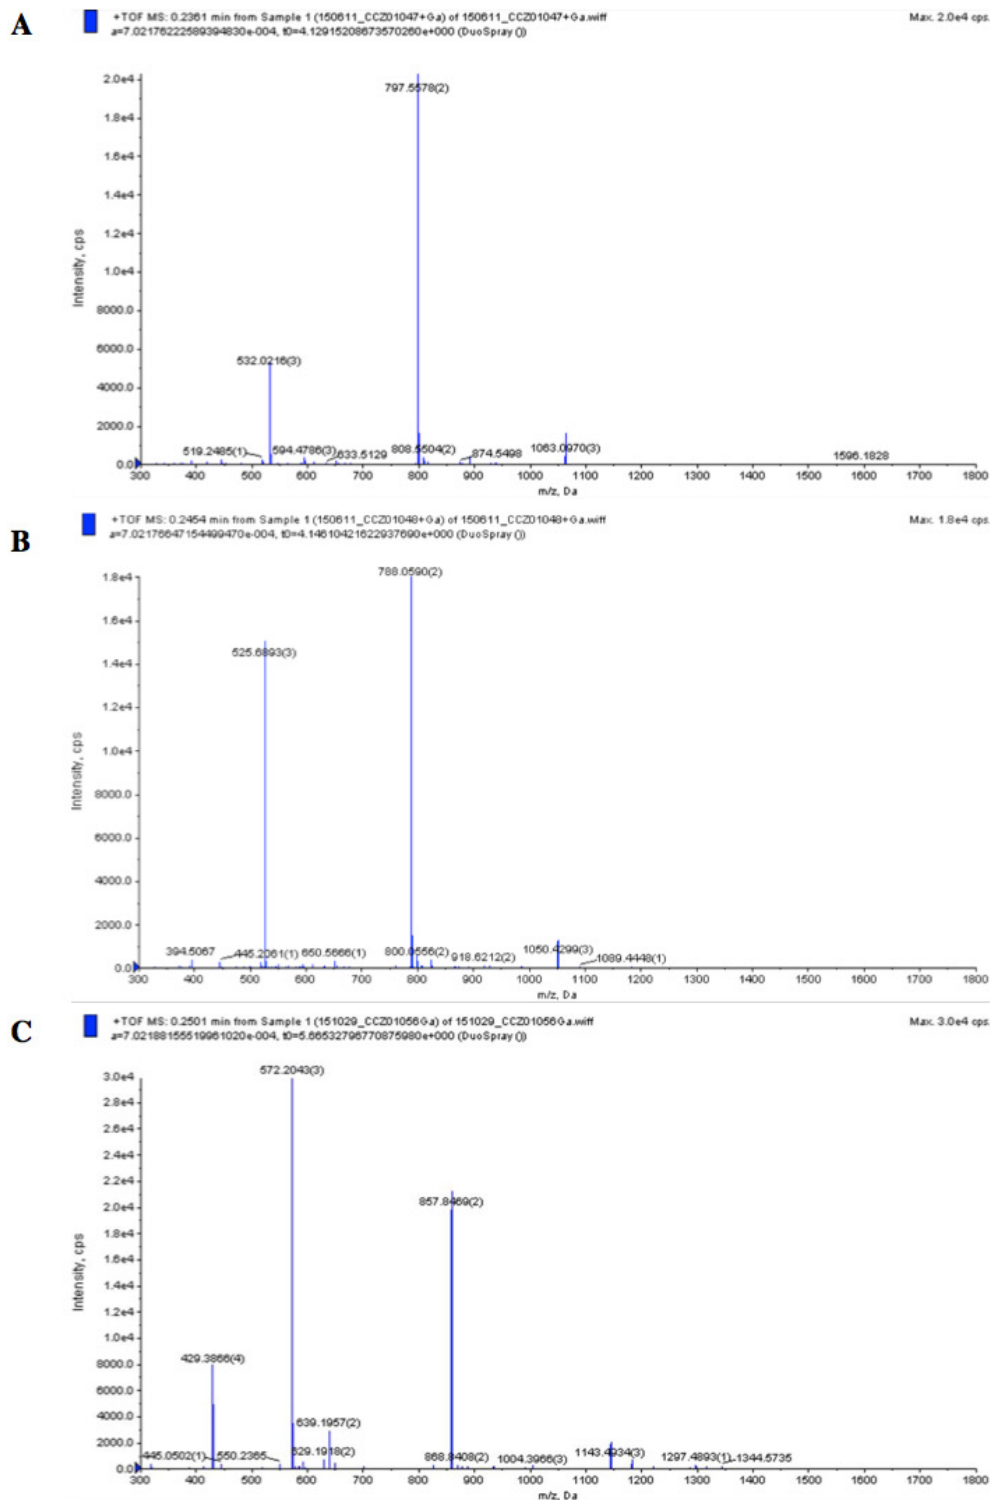

**Figure S2.** Mass analysis for non-radioactive gallium-labeled **A.** CCZ01047, mass calculated 1593.71, found 1595.12 ( $M+2H$ ), **B.** CCZ01048, mass calculated 1574.71, found 1576.12 ( $M+2H$ ), and **C.** CCZ01056, mass calculated 1714.81, found 1715.69 ( $M+1H$ ).

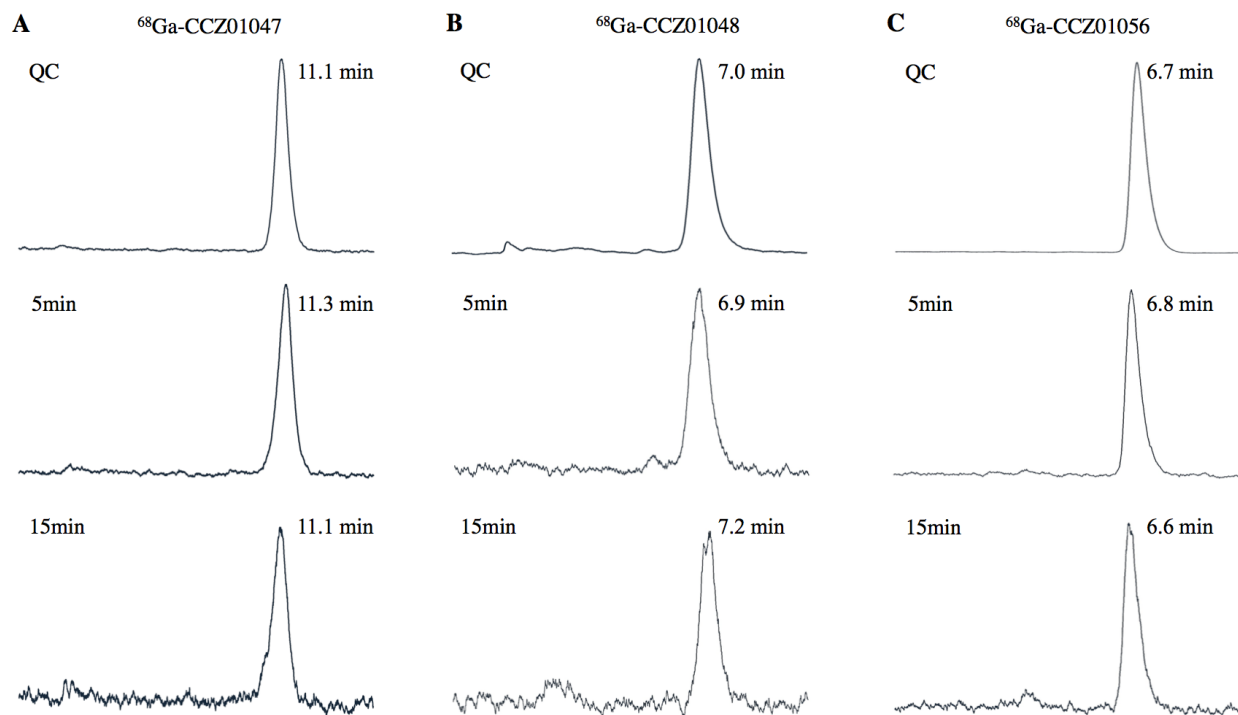

**Figure S3.** *In vivo* stability in blood plasma for **A.**  $^{68}\text{Ga}$ -CCZ01047, **B.**  $^{68}\text{Ga}$ -CCZ01048, and **C.**  $^{68}\text{Ga}$ -CCZ01056, at 5 and 15 min p.i. QC, quality control of tracer alone. All tracers were prepared with > 95% radiochemical purity.

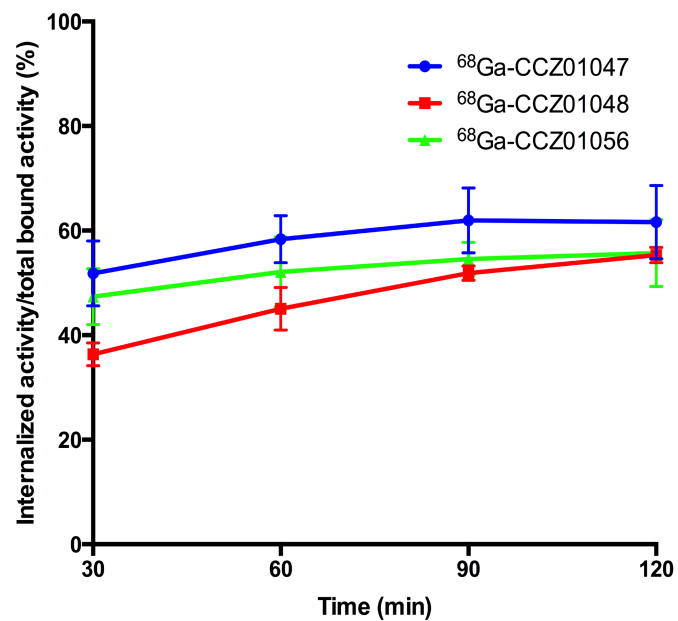

**Figure S4.** Internalization of  $^{68}\text{Ga-CCZ01047}$ ,  $^{68}\text{Ga-CCZ01048}$ , and  $^{68}\text{Ga-CCZ01056}$  in B16F10 cells. Total bound activity is the sum of internalized and surface-bound activity.

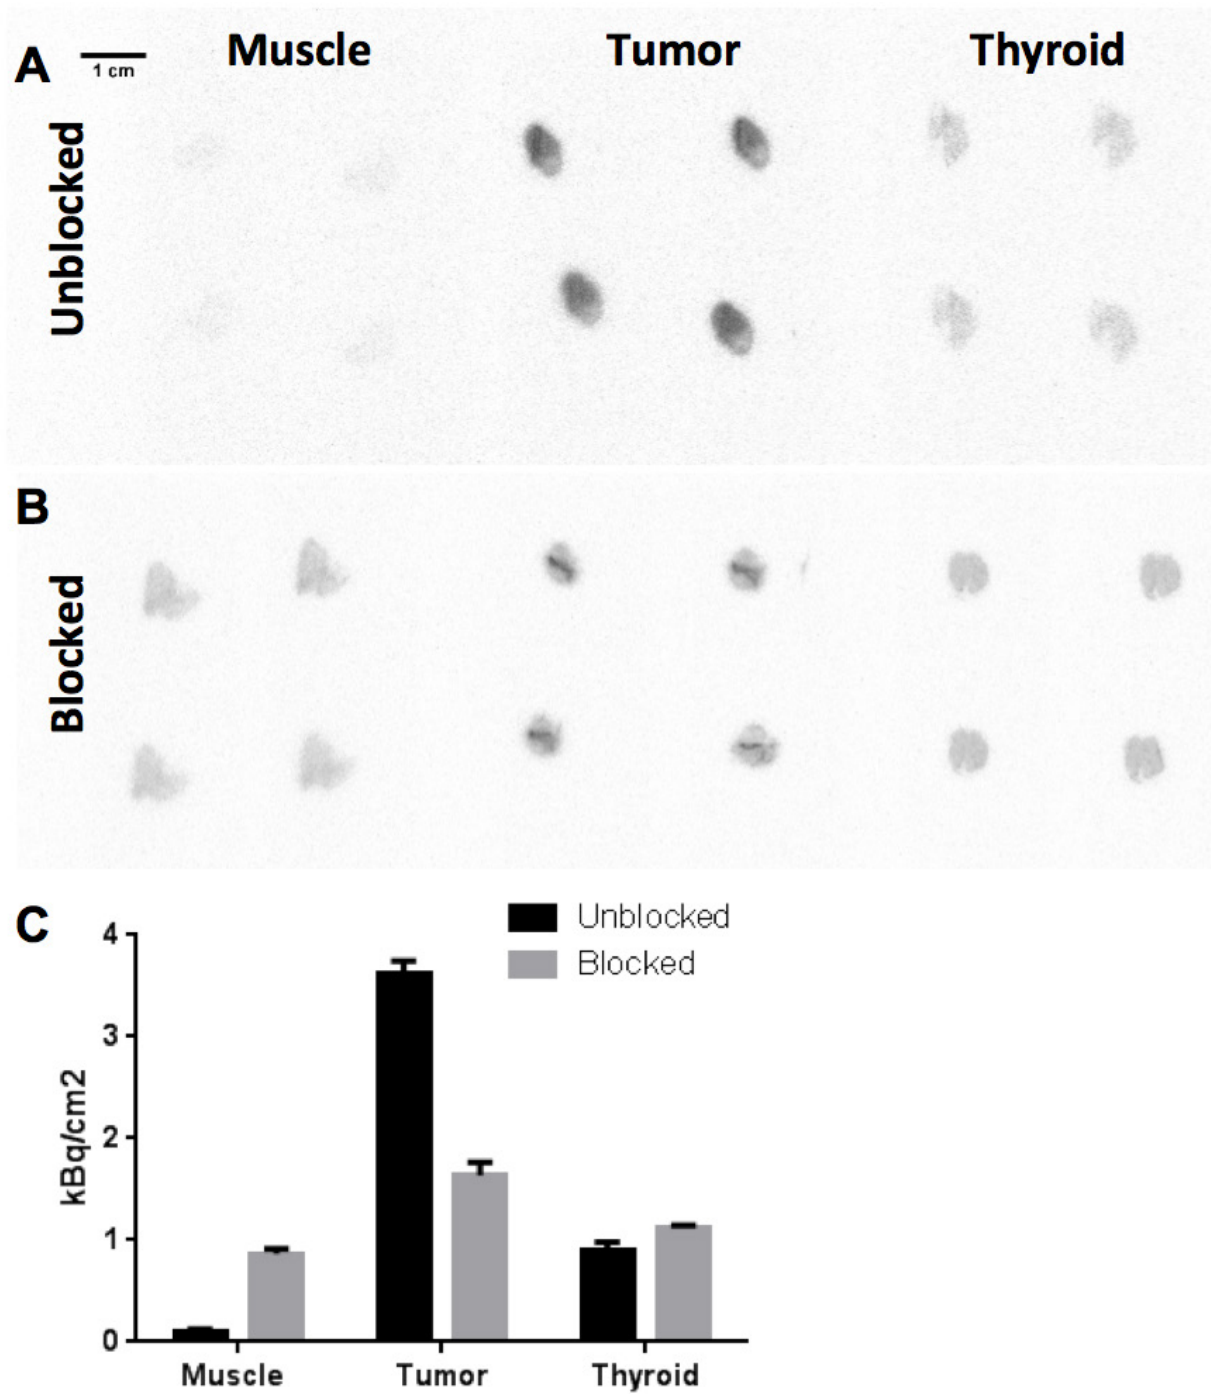

**Figure S5.** *In vivo* radioactivity distribution of <sup>68</sup>Ga-CCZ01048 in muscle, tumor and thyroid **A.** without and **B.** with co-injection of 100 µg of non-radioactive Ga-labeled CCZ01048 (blocked) using autoradiography. **C.** Comparison of radioactivity uptake in muscle, tumor and thyroid in unblock and blocked conditions. All conditions were performed in four replicates.
